# Supplementary material
Source: Springer Nature journal article supplement (https://www.springermedizin.de/resource/supplementary/13002_2007_95_MOESM1_ESM.pdf/9627148)
Supplement: MOESM1 [file 9627148]

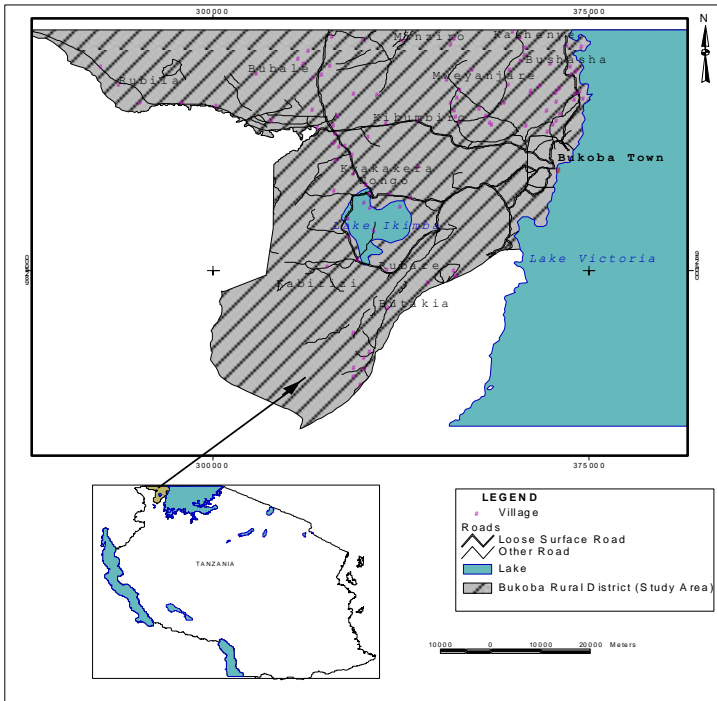

300000

375000

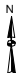

Mwanimo Kakenye Bushasha  
 Bubila Bubale Mwevanjire  
 Kibumbiro  
 Kakakera Longo Bukoba Town  
 Lake Ikipa  
 Kibale Kibira Buhakia

Lake Victoria

0581000

0582000

300000

375000

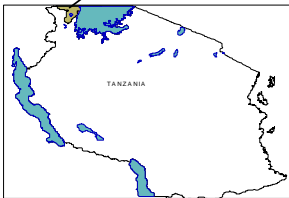

**LEGEND**

- Village
- Roads
  - Loose Surface Road
  - Other Road
- Lake
- Bukoba Rural District (Study Area)

10000 0 10000 20000 Meters
